# Supplementary material
Source: Springer Nature journal article supplement (https://www.springermedizin.de/resource/supplementary/13075_2009_3035_MOESM3_ESM.pdf/9693384)
Supplement: MOESM3 [file 9693384]

**B-cells****CD27 negative B-cells****CD27 positive B-cells**

Incubation without epratuzumab

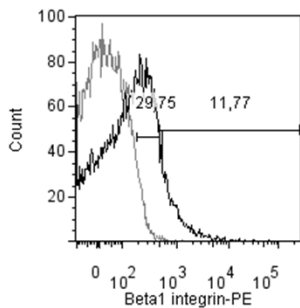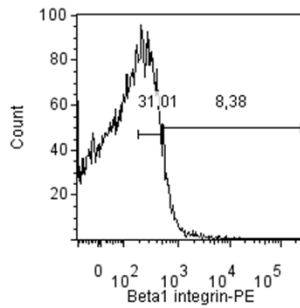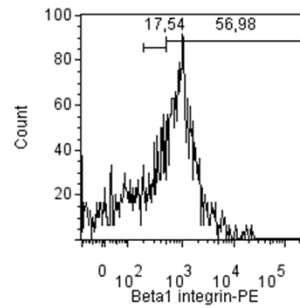

Incubation with human IgG1

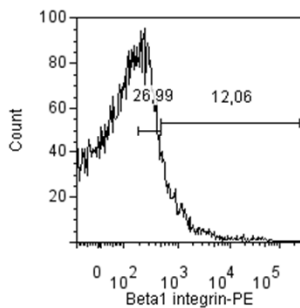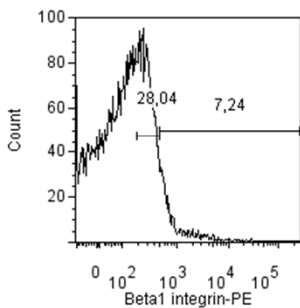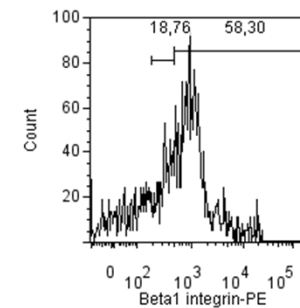

Incubation with epratuzumab

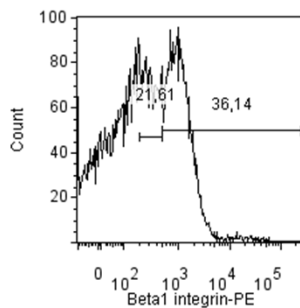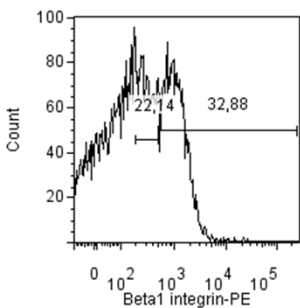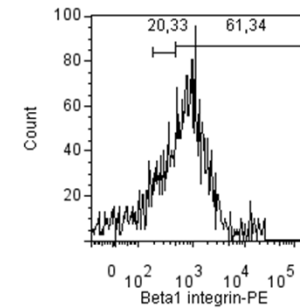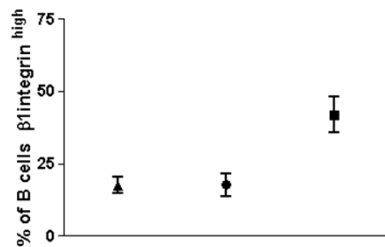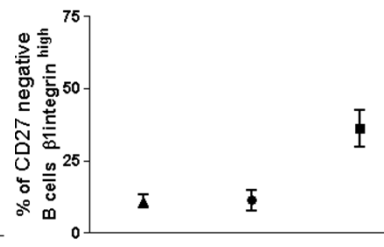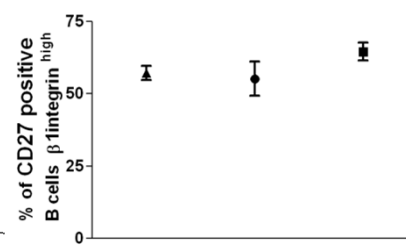

- ▲ Incubation without epratuzumab
- Incubation with human IgG1
- Incubation with epratuzumab
